# Supplementary material for: Development and validation of a digital biopsy model to predict microvascular invasion in hepatocellular carcinoma
Source: PubMed Central journal article supplement (PMC11457731; doi:10.3389/fonc.2024.1360936), 2024-09-17

## Supplementary Material

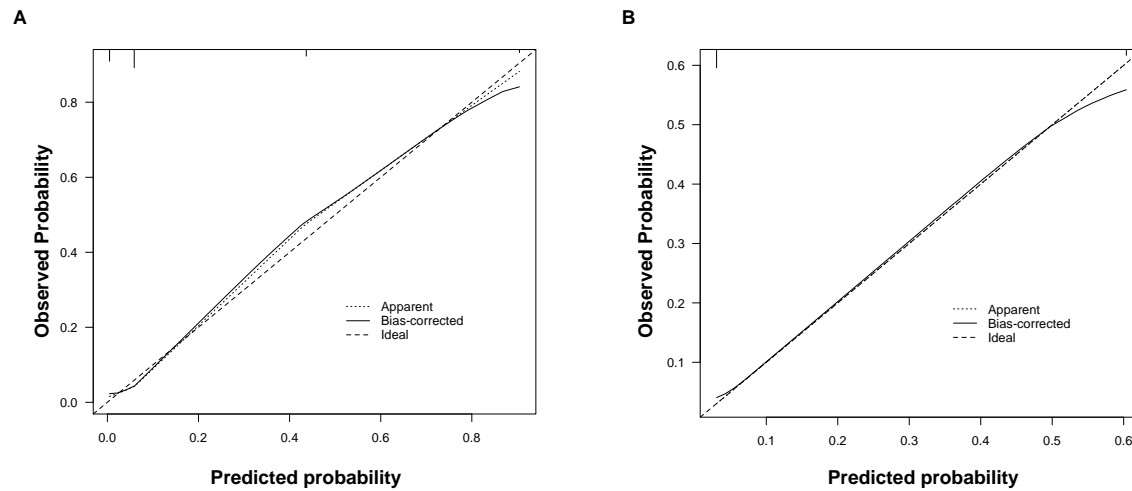

Supplement: Image1.pdf [file Image1.pdf]
